# Supplementary material for: Photovoltaic Performance of Dye-Sensitized Solar Cells Containing ZnO Microrods
Source: PubMed Central journal article supplement (PMC6956303; doi:10.3390/nano9121645), 2019-11-20
Supplement: nanomaterials-09-01645-s001.pdf [file nanomaterials-09-01645-s001.pdf]

Article

# Photovoltaic Performance of Dye-Sensitized Solar Cells Containing ZnO Microrods

Seong Il Cho <sup>1,†</sup>, Hye Kyeong Sung <sup>2,†</sup>, Sang-Ju Lee <sup>3</sup>, Wook Hyun Kim <sup>3</sup>, Dae-Hwan Kim <sup>3,\*</sup> and Yoon Soo Han <sup>1,\*</sup>

<sup>1</sup> School of Advanced Materials and Chemical Engineering, Daegu Catholic University, Gyeongbuk 38430, Korea; pokw1231@naver.com

<sup>2</sup> Department of Organic Material Science and Engineering, Pusan National University, Busan 46241, Korea; amrm1995@naver.com

<sup>3</sup> Division of Energy Technology, Daegu Gyeongbuk Institute of Science and Technology (DGIST), Daegu 42988, Korea; tglee@dgist.ac.kr (S.-J.L.); kwh1980@dgist.ac.kr (W.H.K.)

\* Correspondence: monolith@dgist.ac.kr (D.-H.K.); yshancu@cu.ac.kr (Y.S.H.); Tel: +82-53-785-3720 (D.-H.K.); +82-53-850-2773 (Y.S.H.); Fax: +82-53-785-3739 (D.-H.K.); +82-53-359-6662 (Y.S.H.)

† These authors contributed equally to this work.

## 1. Current density-voltage profiles of DSSCs with ZnO/FTO photoelectrodes

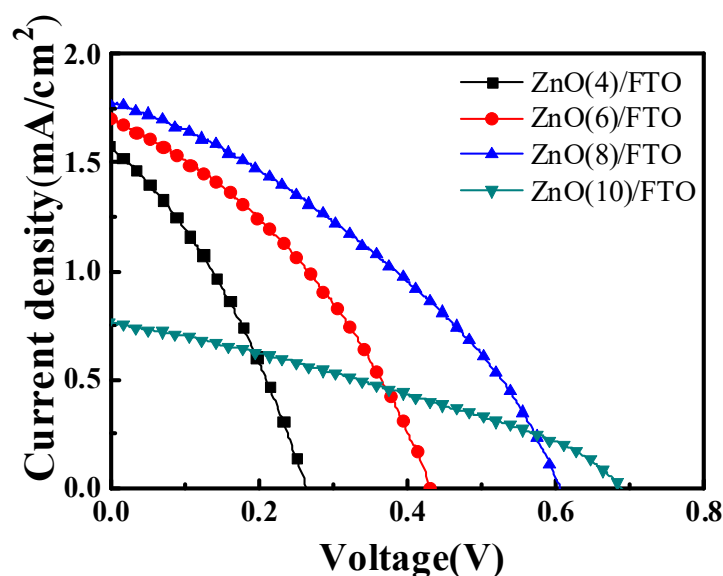

Figure S1. *J*-*V* characteristics of DSSCs with ZnO/FTO photoelectrodes.

Table S1. Photovoltaic parameters of DSSCs with ZnO/FTO photoelectrodes

| Applied photoelectrodes | $V_{oc}$<br>(mV) | $J_{sc}$<br>(mA/cm <sup>2</sup> ) | <i>FF</i><br>(%) | $\eta$<br>(%) |
|-------------------------|------------------|-----------------------------------|------------------|---------------|
|                         |                  |                                   |                  |               |

|             |       |       |       |       |
|-------------|-------|-------|-------|-------|
| ZnO(4)/FTO  | 0.264 | 1.572 | 43.94 | 0.182 |
| ZnO(6)/FTO  | 0.424 | 1.703 | 37.02 | 0.267 |
| ZnO(8)/FTO  | 0.606 | 1.577 | 35.77 | 0.341 |
| ZnO(10)/FTO | 0.688 | 1.799 | 32.88 | 0.180 |

## 2. Electrochemical impedance spectroscopic analysis of DSSCs with ZnO/FTO photoelectrodes

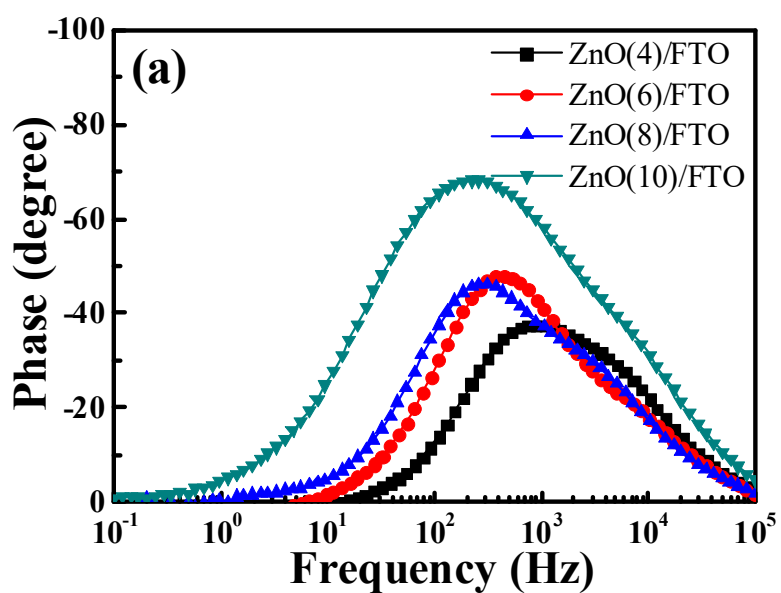

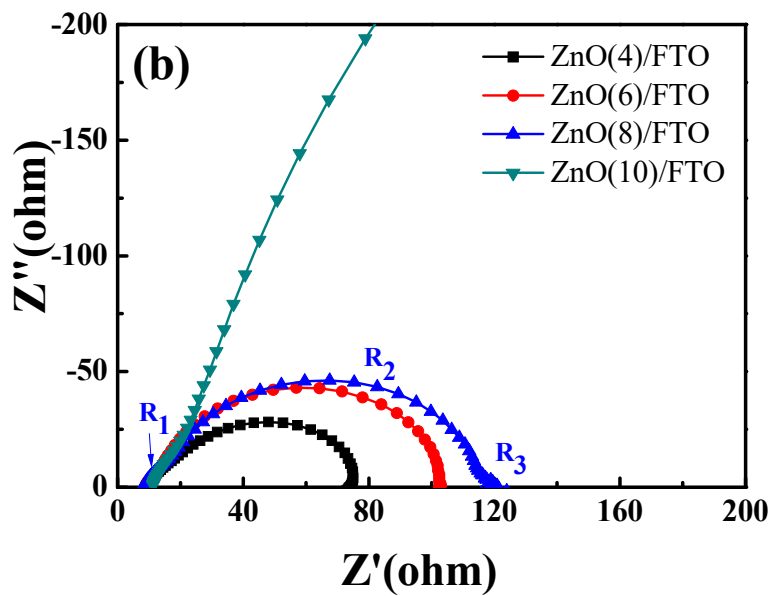

Figure S2. EIS spectra of the DSSCs with the ZnO/FTO photoelectrodes; (a) Bode and (b) Nyquist plots measured at  $-0.7$  V in the dark.

### 3. Dark current-voltage profiles of DSSCs with ZnO/FTO photoelectrodes

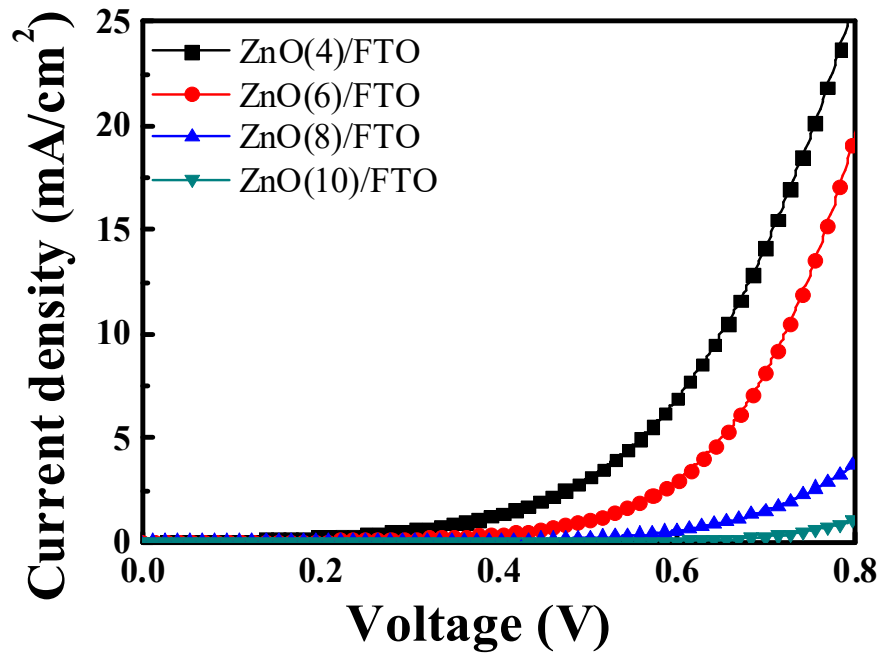

Figure S3. Dark current-voltage characteristics of DSSCs with ZnO/FTO photoelectrodes.
